# Supplementary material
Source: publisher figshare collection journal article supplement (https://gsapubs.figshare.com/ndownloader/files/31185097)
Supplement: Supplementary file 1 [file 31185097]

Supplemental References Cited

Fouquet, Y., 1989, NAUTILAU cruise, RV Le Nadir: Plouzané, France, IFREMER, <https://doi.org/10.17600/89008711>.

Hourdez, S., and Jollivet, D., 2019, CHUBACARC cruise, RV L’Atalante: Plouzané, France, IFREMER, <https://doi.org/10.17600/18001111>.

sLupton, J.E., Pyle, D.G., Jenkins, W.J., Greene, R., and Evans, L., 2004, Evidence for an extensive hydrothermal plume in the Tonga-Fiji region of the South Pacific: Geochemistry Geophysics Geosystems, v. 5, Q01003, <https://doi.org/10.1029/2003GC000607>.

Lytle, M.L., Kelley, K.A., Hauri, E.H., Gill, J.B., Papia, D., and Arculus, R.J., 2012, Tracing mantle sources and Samoan influence in the northwestern Lau back-arc basin: Geochemistry Geophysics Geosystems, v. 13, Q10019, <https://doi.org/10.1029/2012GC004233>.

Pelletier, B., and Lagabrielle, Y., 2000, ALAUFI cruise, RV L’Atalante: Plouzané, France, IFREMER, https://doi.org/10.17600/10030.
